# Supplementary material for: Phylogenetic analysis of the genus Laparocerus, with comments on colonisation and diversification in Macaronesia (Coleoptera, Curculionidae, Entiminae)
Source: PubMed Central journal article supplement (PMC5345357; doi:10.3897/zookeys.651.10097), 2017-02-02

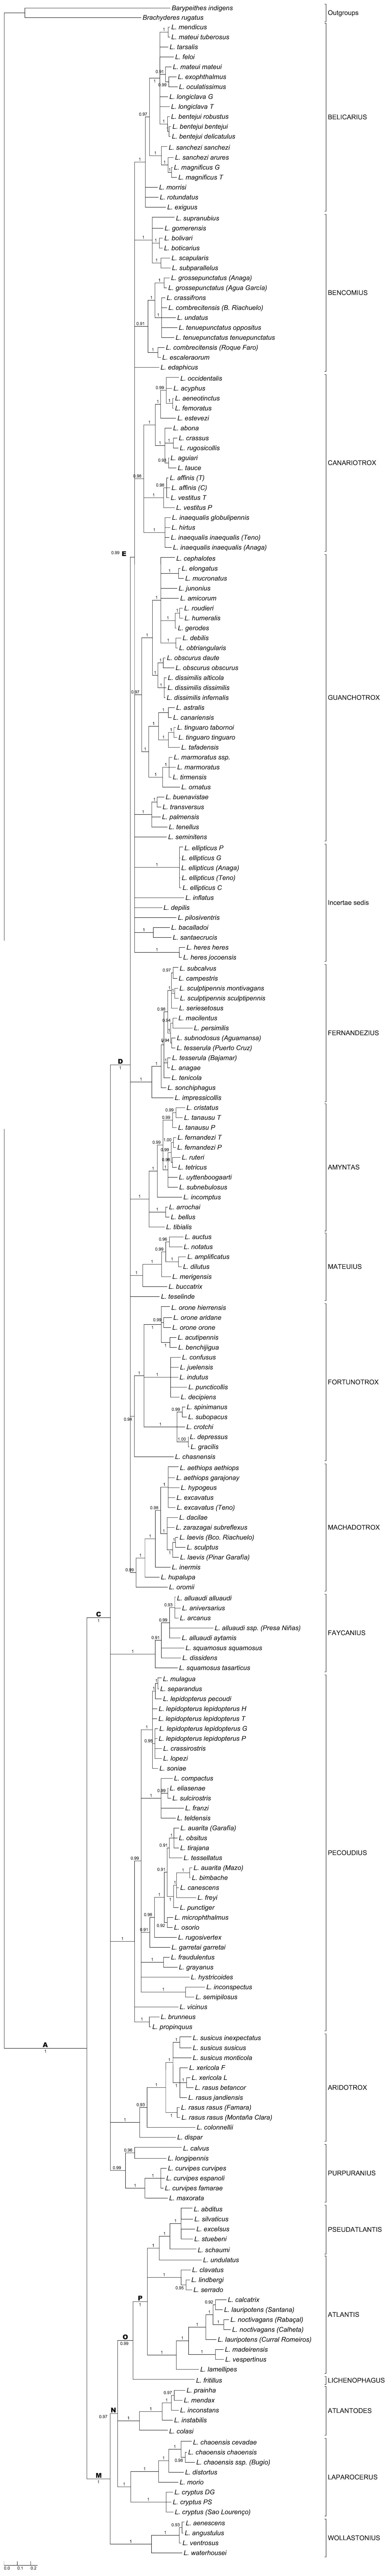

Supplement: zookeys-651-001-s002.pdf [file zookeys-651-001-s002.pdf]
