# Supplementary material for: Phylogenetic analysis of the genus Laparocerus, with comments on colonisation and diversification in Macaronesia (Coleoptera, Curculionidae, Entiminae)
Source: PubMed Central journal article supplement (PMC5345357; doi:10.3897/zookeys.651.10097), 2017-02-02

Chronogram of genus *Laparocerus* Schönherr, 1834 from Macaronesia (Coleoptera, Curculionidae, Entiminae)

A. Machado, E. Rodríguez, M. López, M. Hernández

Source codes

|                 |    |
|-----------------|----|
| Gran Canaria    | C  |
| Dezertas: Bugio | DB |
| Dezertas: Chão  | DC |
| Dezerta Grande  | DG |
| Fuerteventura   | F  |
| La Gomera       | G  |
| El Hierro       | H  |
| Morocco         | K  |
| Lanzarote       | L  |
| Madeira         | M  |
| Porto Santo     | PS |
| Selvagens       | S  |
| Tenerife        | T  |

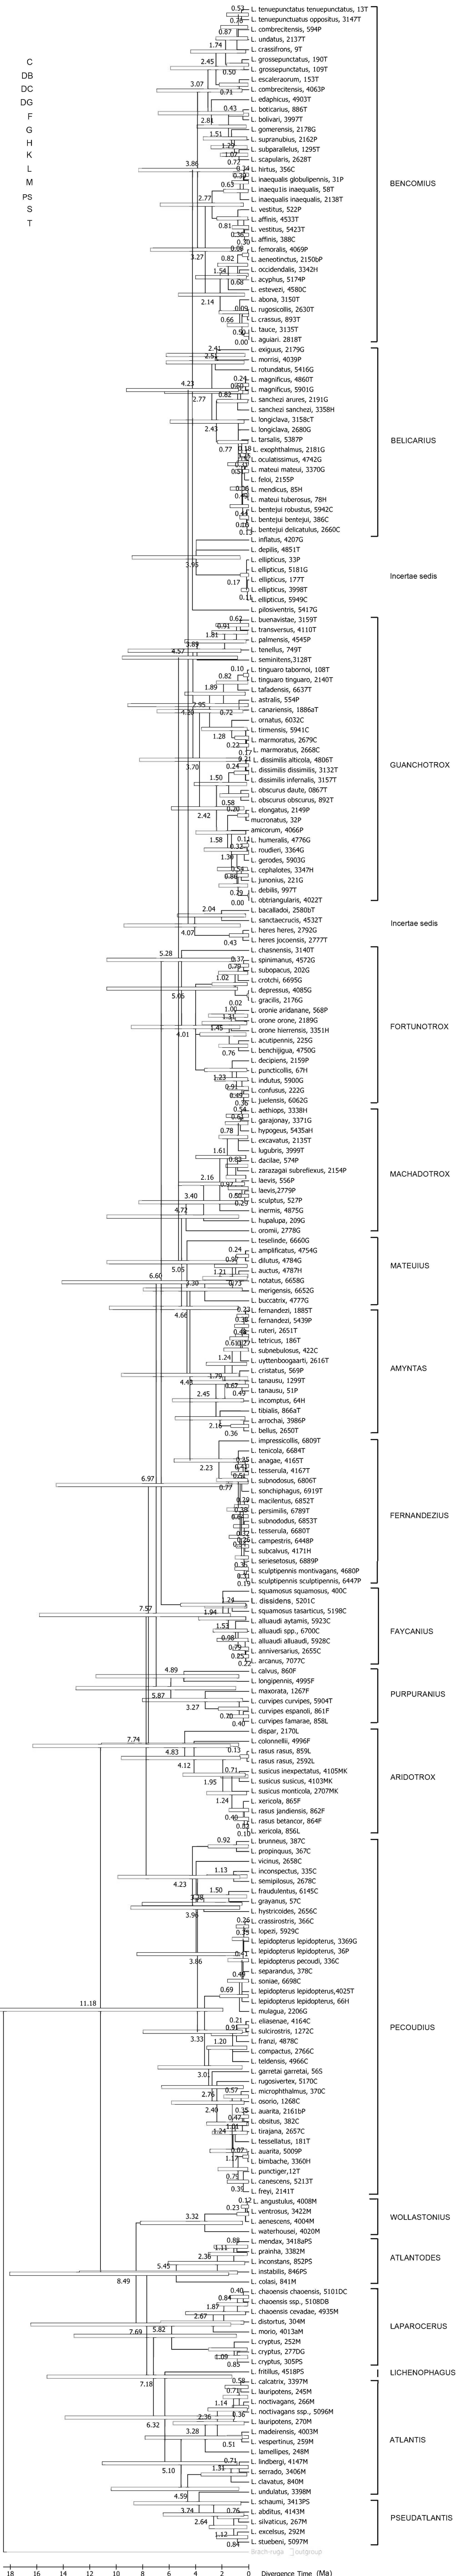

Supplement: zookeys-651-001-s003.pdf [file zookeys-651-001-s003.pdf]
